# Supplementary material for: Comprehensive Lifestyle Improvement Program for Prostate Cancer (CLIPP): Protocol for a Feasibility and Exploratory Efficacy Study in Men on Androgen Deprivation Therapy
Source: PubMed Central journal article supplement (PMC6379812; doi:10.2196/12579), 2019-02-05
Supplement: resprot_v8i2e12579_app3.pdf [file resprot_v8i2e12579_app3.pdf]

**UACC SCIENTIFIC REVIEW COMMITTEE  
OUTCOME REPORT**

**Protocol title:** Comprehensive Lifestyle Improvement Program for Prostate Cancer Survivors

**Protocol number:** 29472

**Principal investigator:** Amit Algotar, MD

**Sponsor:** Arizona Cancer Center

**Date:** 6/4/2018

**Statistical review (i.e., approval, pending, etc.):** approved

**Pharmaceutical review (i.e., approval, pending, etc.):** n/a

**Findings/determination:** APPROVED

**Comments:** This study and the PI's response dated, 5/4/2018, were reviewed by the Scientific Review Committee on 5/11/2018. The response is appropriate and addresses the committee's concerns.

Sincerely,



Linda Garland, MD  
Chair, UACC Scientific Review Committee
